# Supplementary material
Source: HighWire-hosted journal article supplement (https://rapm.bmj.com/content/44/9/839)
Supplement: inline-supplementary-material-2 [file inline-supplementary-material-2.pdf]

**Supplementary Table 2. Risk-adjusted odds of outcome measures for patients undergoing THA according to hospital safety net burden category (in quartiles).**

| <i>Safety net burden (quartiles)</i> | <b>In-hospital mortality</b> | <b>Any complication</b> | <b>Cardiac complication</b> | <b>Pulmonary complication</b> | <b>Infectious complication</b> | <b>Intraoperative complication</b> | <b>LOS</b>   |
|--------------------------------------|------------------------------|-------------------------|-----------------------------|-------------------------------|--------------------------------|------------------------------------|--------------|
| First (lowest) quartile (reference)  | 1.00                         | 1.00                    | 1.00                        | 1.00                          | 1.00                           | 1.00                               | 1.00         |
|                                      | (Reference)                  | (Reference)             | (Reference)                 | (Reference)                   | (Reference)                    | (Reference)                        | (Reference)  |
| Second quartile                      | 1.34**                       | 0.99                    | 0.99                        | 1.03                          | 1.04                           | 1.02                               | 1.00         |
|                                      | (1.07, 1.67)                 | (0.89, 1.12)            | (0.89, 1.12)                | (0.89, 1.19)                  | (0.89, 1.22)                   | (0.79, 1.32)                       | (0.99, 1.00) |
| Third quartile                       | 1.44**                       | 1.03                    | 1.02                        | 1.05                          | 1.05                           | 1.06                               | 1.03***      |
|                                      | (1.14, 1.82)                 | (0.92, 1.16)            | (0.91, 1.15)                | (0.91, 1.22)                  | (0.90, 1.23)                   | (0.81, 1.38)                       | (1.02, 1.03) |
| Fourth (top) quartile                | 1.61**                       | 1.14                    | 1.09                        | 1.15                          | 1.29**                         | 1.30                               | 1.08***      |
|                                      | (1.21, 2.15)                 | (1.00, 1.30)            | (0.94, 1.26)                | (0.98, 1.37)                  | (1.07, 1.54)                   | (0.97, 1.76)                       | (1.07, 1.09) |
| N                                    | 500110                       | 500188                  | 500188                      | 500188                        | 500188                         | 500188                             | 500188       |

\*  $p < 0.05$ , \*\*  $p < 0.01$ , \*\*\*  $p < 0.001$ .

Percents may not sum to 100 due to rounding and missing values. All numbers reported are n (%), odds ratios (95% CI) unless noted otherwise.

^^Median (interquartile range)

^^^ Incidence rate ratio (IRR), 95% confidence interval (CI)

Models were clustered on hospital as a level-two covariate (random effect) and were adjusted for primary insurance payer, race/ethnicity, quartile of median income, sex, age, select Elixhauser comorbidity measures, year of procedure, quartile of hospital THA procedure volume; and hospital state
