# Supplementary material
Source: HighWire-hosted journal article supplement (https://rapm.bmj.com/content/44/9/839)
Supplement: inline-supplementary-material-3 [file inline-supplementary-material-3.pdf]

@RAPMOnline

## POORER OUTCOMES

# For Hip Arthroplasty in High vs Low Safety Net Burden Hospitals

DOI: 10.1136/rapm-2018-100305

### Safety Net Hospitals

"Hospitals with a high proportion of cases billed to Medicaid or without insurance, [who] deliver a significant portion of their care to vulnerable populations"

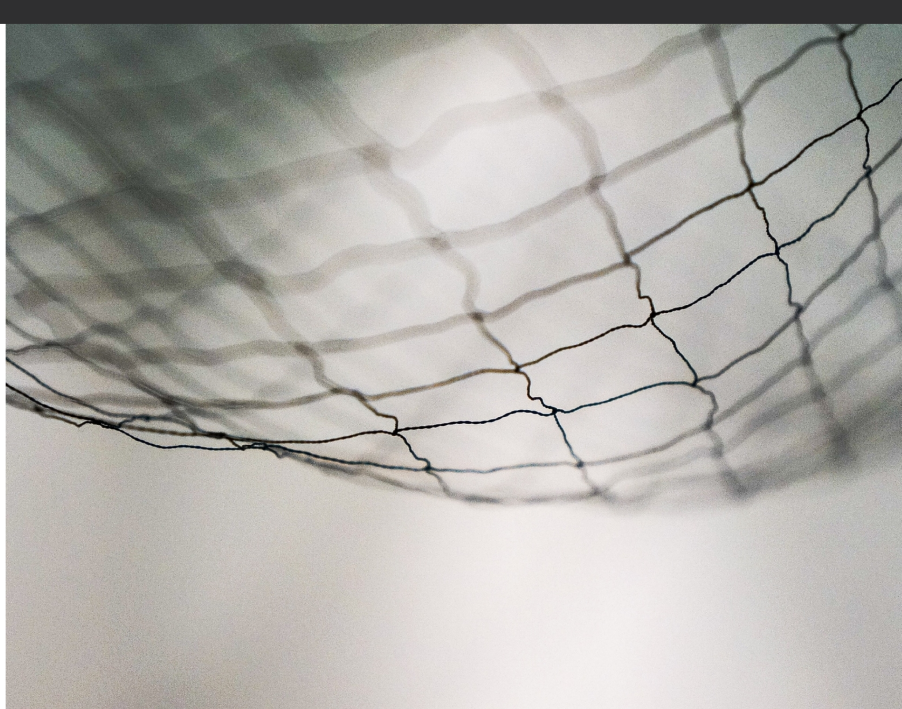

### State Inpatient Databases

2007 - 2014

500,000+ Patients

### Burden of Medicaid or Uninsured (%)

High

> 30.5%

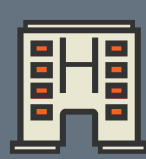

Medium

17-30.5%

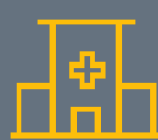

Low

<17%

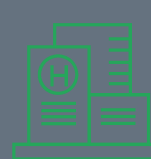

High Safety Net Hospitals

VS

Low Safety Net Hospitals

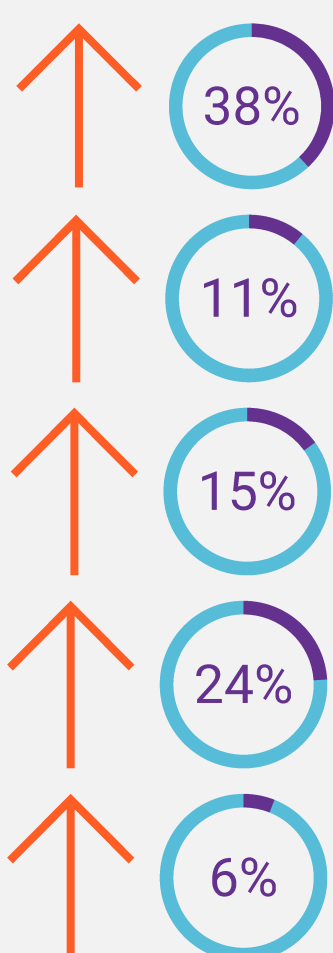

worse

Mortality

worse

Postop Complications

worse

CV Complications

worse

Infectious Complications

worse

Length of Stay

High Safety Net Hospitals

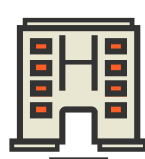

2.5 TIMES

More likely to have

General Anesthesia

instead of

Regional Anesthesia

Click Here for Article

Regional Anesthesia & Pain Medicine

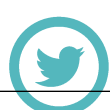

@RAPMOnline
